# Supplementary material for: Optical spectra, electronic structure and aromaticity of benzannulated N-heterocyclic carbene and its analogues of the type C6H4(NR)2E: (E = Si, Ge, Sn, Pb)
Source: Royal Society of Chemistry journal article supplement (doi:10.1039/c7dt00356k), 2017-01-01

**Table S1.** Experimental and calculated\* (PBE0) geometry parameters for IIIC-Pb.

| E                                              | III <sub>C</sub> <sup>11</sup> | III <sub>Si</sub> <sup>12</sup> | III <sub>Ge</sub> <sup>10c</sup> | III <sub>Sn</sub> <sup>13</sup> | III <sub>Pb</sub> <sup>14</sup> | <i>o</i> -C <sub>6</sub> H <sub>4</sub> (NHMe) <sub>2</sub> |
|------------------------------------------------|--------------------------------|---------------------------------|----------------------------------|---------------------------------|---------------------------------|-------------------------------------------------------------|
| El-N <sub>1</sub>                              | 1.361(2)                       | 1.752(3)                        | 1.861(3)                         | 2.051(5)                        | 2.180(4)                        |                                                             |
| El-N <sub>2</sub>                              | 1.374(2)                       | 1.747(3)                        | 1.866(3)                         | 2.067(5)                        | 2.180(4)                        |                                                             |
|                                                | <i>1.363</i>                   | <i>1.768</i>                    | <i>1.876</i>                     | <i>2.068</i>                    | <i>2.210</i>                    |                                                             |
| N <sub>1</sub> -C <sub>1</sub>                 | 1.397(2)                       | 1.385(5)                        | 1.393(5)                         | 1.382(8)                        | 1.373(7)                        |                                                             |
| N <sub>2</sub> -C <sub>6</sub>                 | 1.388(2)                       | 1.380(5)                        | 1.391(5)                         | 1.376(7)                        |                                 |                                                             |
|                                                | <i>1.390</i>                   | <i>1.389</i>                    | <i>1.383</i>                     | <i>1.397</i>                    | <i>1.401</i>                    | <i>1.40</i>                                                 |
| C <sub>1</sub> -C <sub>6</sub>                 | 1.395(2)                       | 1.417(5)                        | 1.433(9)                         | 1.433(10)                       | 1.441(10)                       |                                                             |
|                                                | <i>1.400</i>                   | <i>1.411</i>                    | <i>1.417</i>                     | <i>1.427</i>                    | <i>1.447</i>                    | <i>1.42</i>                                                 |
| C <sub>1</sub> -C <sub>2</sub>                 | 1.390(2)                       | 1.395                           | 1.399(8)                         | 1.397(10)                       | 1.416(7)                        |                                                             |
| C <sub>5</sub> -C <sub>6</sub>                 | 1.382(2)                       | 1.392                           | 1.397(10)                        | 1.398                           | 1.416(7)                        |                                                             |
|                                                | <i>1.390</i>                   | <i>1.394</i>                    | <i>1.398</i>                     | <i>1.404</i>                    | <i>1.419</i>                    | <i>1.39</i>                                                 |
| C <sub>2</sub> -C <sub>3</sub>                 | 1.369(2)                       | 1.373                           | 1.382(11)                        | 1.379(10)                       | 1.371(7)                        |                                                             |
| C <sub>4</sub> -C <sub>5</sub>                 | 1.376(2)                       | 1.382                           | 1.379(11)                        | 1.382                           | 1.371(7)                        |                                                             |
|                                                | <i>1.389</i>                   | <i>1.391</i>                    | <i>1.390</i>                     | <i>1.391</i>                    | <i>1.390</i>                    | <i>1.39</i>                                                 |
| C <sub>3</sub> -C <sub>4</sub>                 | 1.390(3)                       | 1.374                           | 1.371(11)                        | 1.371(11)                       | 1.440(10)                       |                                                             |
|                                                | <i>1.399</i>                   | <i>1.391</i>                    | <i>1.391</i>                     | <i>1.393</i>                    | <i>1.399</i>                    | <i>1.38</i>                                                 |
| N <sub>1</sub> -El-N <sub>2</sub>              | 103.49(13)                     | 88.2(1)                         | 84.9(1)                          | 78.49                           | 75.8(2)                         |                                                             |
|                                                | <i>107.07</i>                  | <i>89.05</i>                    | <i>85.68</i>                     | <i>80.79</i>                    | <i>77.41</i>                    |                                                             |
| El-N <sub>1</sub> -C <sub>1</sub>              | 112.36(13)                     | 111.9(3)                        | 114.0(2)                         | 115.32                          | 115.3(3)                        |                                                             |
| El-N <sub>2</sub> -C <sub>6</sub>              | 112.80(12)                     | 111.3(3)                        | 114.2(2)                         | 115.07                          | 115.3(3)                        |                                                             |
|                                                | <i>112.32</i>                  | <i>112.88</i>                   | <i>112.97</i>                    | <i>112.95</i>                   | <i>113.29</i>                   |                                                             |
| N <sub>1</sub> -C <sub>1</sub> -C <sub>6</sub> | 106.17(14)                     | 111.92                          | 115.2(5)                         | 115.10                          | 116.4(3)                        |                                                             |
| N <sub>2</sub> -C <sub>6</sub> -C <sub>1</sub> | 105.73(14)                     | 111.33                          | 115.1(5)                         | 115.16                          | 116.4(3)                        |                                                             |
|                                                | <i>105.63</i>                  | <i>112.60</i>                   | <i>114.19</i>                    | <i>116.65</i>                   | <i>118.01</i>                   |                                                             |

\*marked by italics

**Table S2** Frontier MOs for **III** at PBE0 level.

| El=                     | HOMO[-2]                                                                                          | HOMO[-1]                                                                                     | HOMO                                                                                                | LUMO                                                                                          |
|-------------------------|---------------------------------------------------------------------------------------------------|----------------------------------------------------------------------------------------------|-----------------------------------------------------------------------------------------------------|-----------------------------------------------------------------------------------------------|
| <b>III<sub>c</sub></b>  | 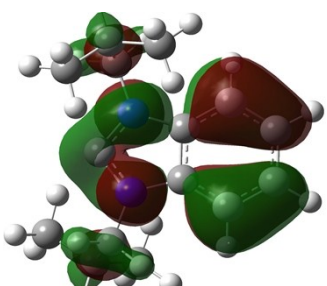<br>1(p)+2(s)%*  | <br>13(p)% | <br>50(s)+42(p)% | <br>19(p)% |
| <b>III<sub>Si</sub></b> | <br>58(s)+26(p)% | <br>0%     | <br>14(p)%       | <br>68(p)% |

|                         |                                                                                                         |                                                                                              |                                                                                                   |                                                                                                        |
|-------------------------|---------------------------------------------------------------------------------------------------------|----------------------------------------------------------------------------------------------|---------------------------------------------------------------------------------------------------|--------------------------------------------------------------------------------------------------------|
| <p>III<sub>Ge</sub></p> | 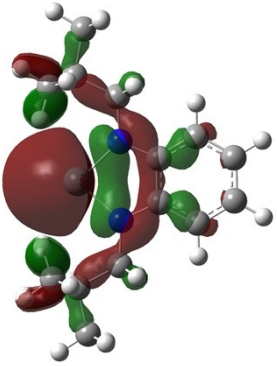 <p>47(s)+ 19(p) %</p> |  <p>0%</p> |  <p>17(p)%</p> |  <p>73(p)%</p>      |
| <p>III<sub>Sn</sub></p> |  <p>36(s)+25(p)%</p>   |  <p>0%</p> |  <p>19(p)%</p> |  <p>70(p)+3(d)%</p> |

|                   |                                                                                                                                        |                                                                                                                        |                                                                                                                                  |                                                                                                                                  |                                                                                                                                  |
|-------------------|----------------------------------------------------------------------------------------------------------------------------------------|------------------------------------------------------------------------------------------------------------------------|----------------------------------------------------------------------------------------------------------------------------------|----------------------------------------------------------------------------------------------------------------------------------|----------------------------------------------------------------------------------------------------------------------------------|
| III <sub>pb</sub> | 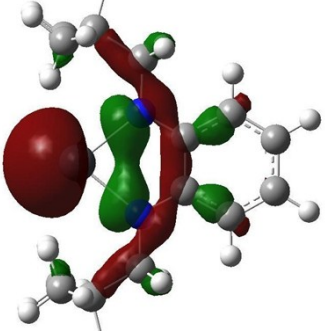 <p data-bbox="398 485 613 517">22 % (p) + 19%(s)</p> |  <p data-bbox="846 485 869 517">0</p> |  <p data-bbox="1128 485 1218 517">22% (p)</p> |  <p data-bbox="1509 485 1599 517">66% (p)</p> |  <p data-bbox="1890 485 1980 517">78% (p)</p> |
|-------------------|----------------------------------------------------------------------------------------------------------------------------------------|------------------------------------------------------------------------------------------------------------------------|----------------------------------------------------------------------------------------------------------------------------------|----------------------------------------------------------------------------------------------------------------------------------|----------------------------------------------------------------------------------------------------------------------------------|

\* The AOs contribution of E<sup>II</sup> atom for each type

**Table S3** Experimental and calculated (in brackets) frequencies ( $\text{cm}^{-1}$ ) of prominent Raman lines.

| IIIa C                     | IIIb Si                          | IIIc Ge                          | IIId Sn                       | IIIe Pb                             | assignment                                                                        |
|----------------------------|----------------------------------|----------------------------------|-------------------------------|-------------------------------------|-----------------------------------------------------------------------------------|
| 767 vs*<br>(759)           | 702 vs<br>(649)                  | 670 vs<br>(613)                  | 647 vs<br>(619)               | 629 vs<br>(615)                     | «breathing» of both rings with some contribution from the N–E <sup>II</sup> bonds |
| 2 s<br>(1013)              | 1033 s<br>(1036)                 | 1034 s<br>(1041)                 | 1036 s<br>(1056)              | 1037 s<br>(1059)                    | #3 (Fig. 4)                                                                       |
| 1182 s<br>(1166)           | 1132 s<br>(1130)                 | 1117 s<br>(1112)                 | 1094 s<br>(1186)              | 1082 s<br>(1076)                    | complex mode                                                                      |
| 1272 sm<br>(1314?)         | 1275 sm<br>(1276)                | 1279 sm<br>(1284)                | 1272 sm<br>(1251)             | 1269 sm<br>(1270)                   | complex mode<br>$\nu(\text{C}_{\text{ar}}\text{N})+\delta\text{CH}$               |
| 1386 s<br>(1349)           | 1365 s<br>(1367)                 | 1360 s<br>(1386)                 | 1359 s<br>(1377)              | 1361 s<br>(1376)                    | complex mode<br>$\nu(\text{CC})_{\text{ar}}+\delta\text{CH}$                      |
| 1446 w                     | 1475<br>(1455)                   | 1471 m<br>(1460)                 | 1473 s<br>(1480)              | 1472<br>(1484)                      | complex mode<br>$\nu(\text{CC})_{\text{ar}}+\delta\text{CH}+\nu\text{CN}$         |
| 1606 sm<br>(1595s, 1596as) | 1579 sh, 1587<br>(1573s, 1580as) | 1568 sh, 1581<br>(1562s, 1577as) | 1550, 1556<br>(1556s, 1577as) | 1542, 1550<br>sh<br>(1550s, 1575as) | #1, #2 (Fig. 4)                                                                   |

\* - relative intensities

**Fig. S1** ACID isosurface plotted for silylene  $\text{III}_{\text{Si}}$  at isovalue 0.06.

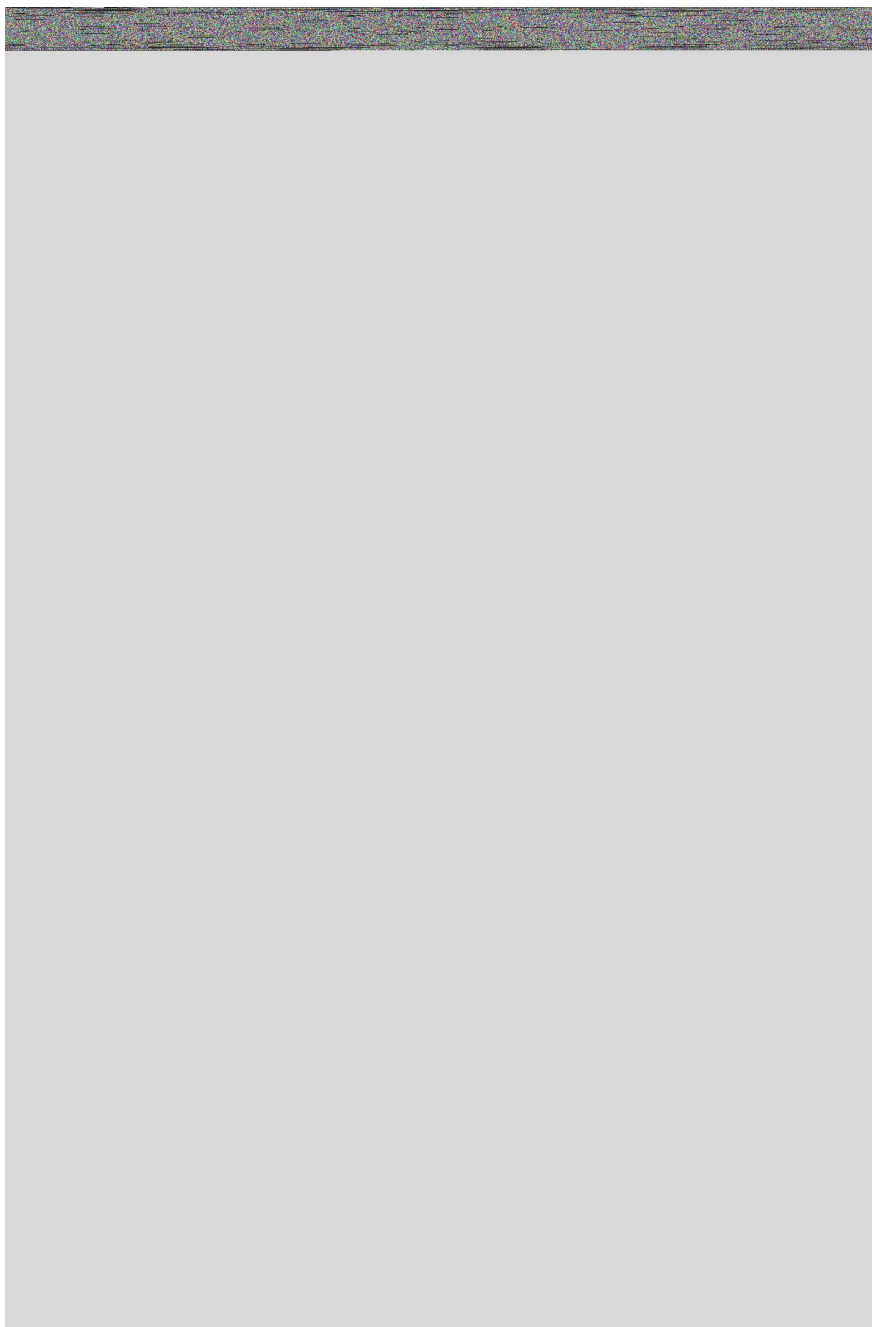

Fig. S2 ACID isosurface plotted for stannylene  $\text{III}_{\text{Sn}}$  at isovalue 0.02.

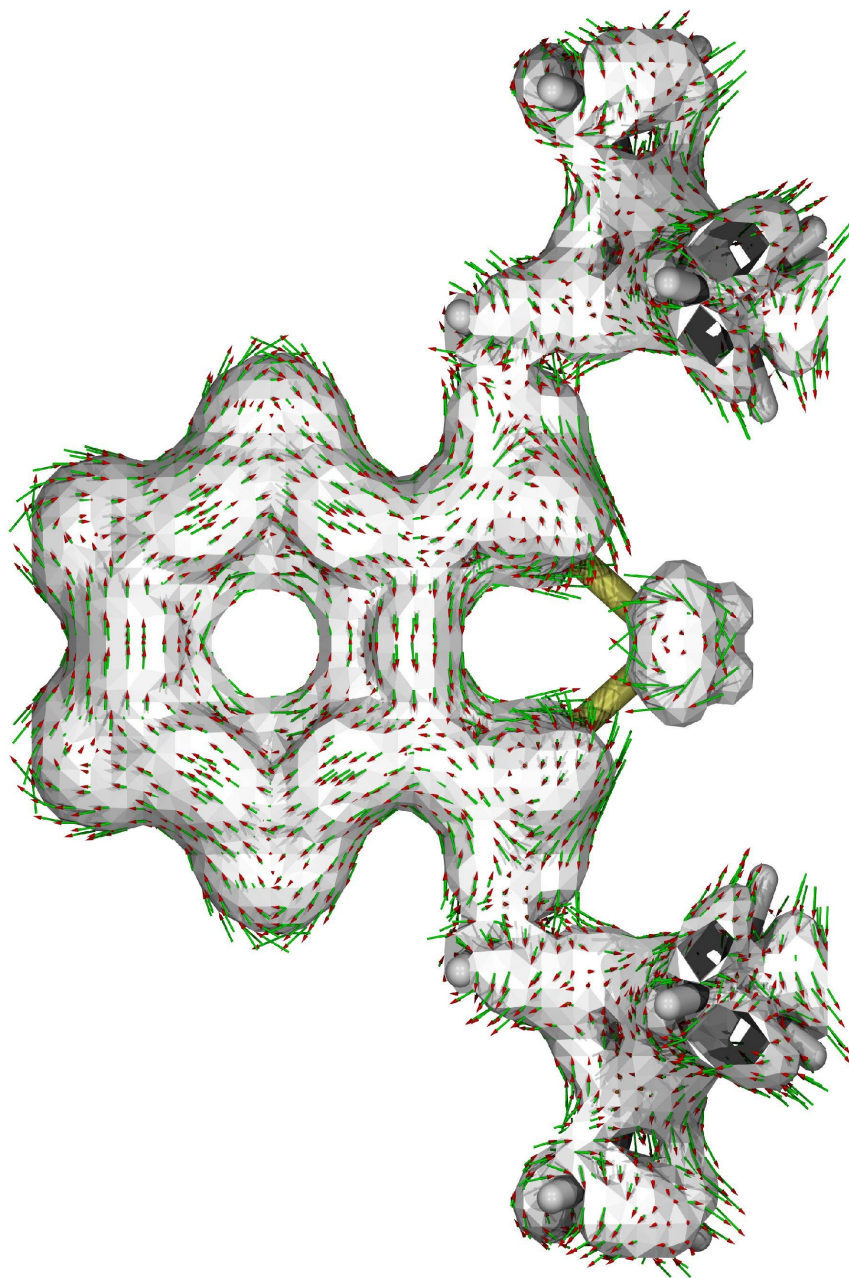

**Fig. S3** ACID isosurface plotted for plumbylene III<sub>Pb</sub> at isovalue 0.02.

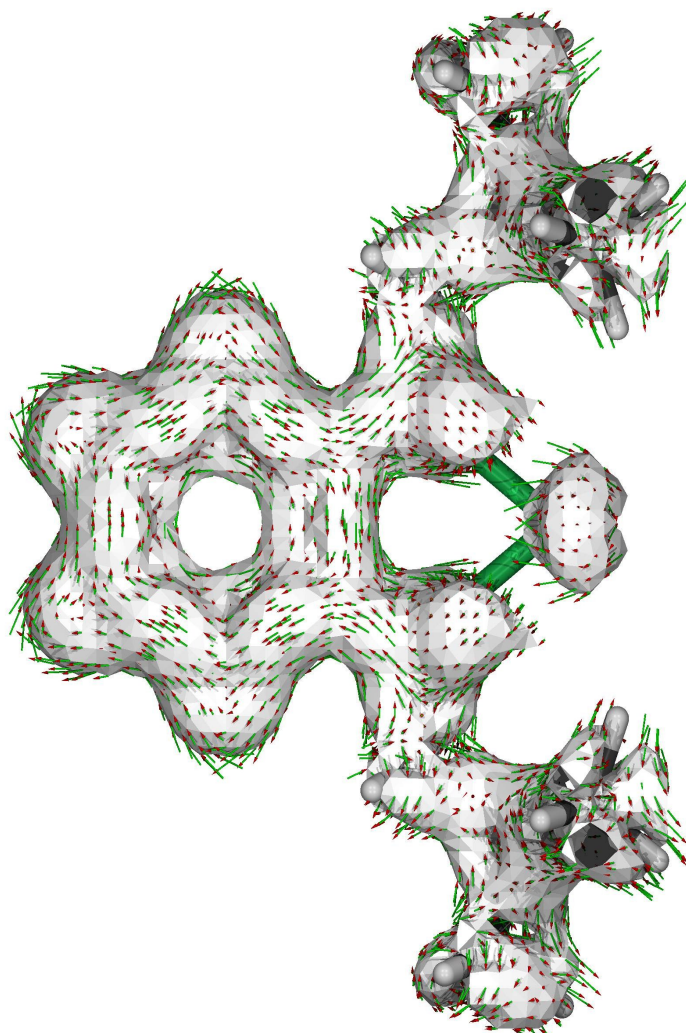



Fig. S4 ACID isosurface plotted for carbene II<sub>c</sub> at isovalue 0.05.

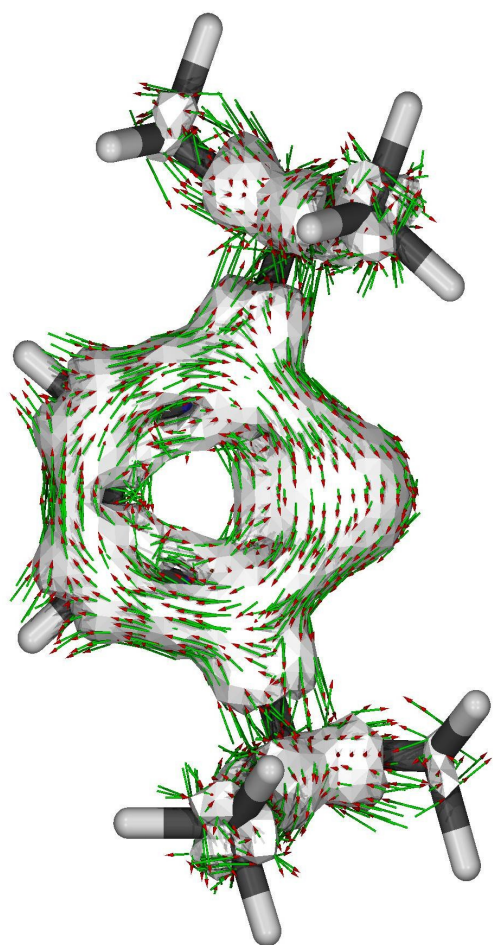

Fig. S5 ACID isosurface plotted for silylene **II<sub>5</sub>** at isovalue 0.05.

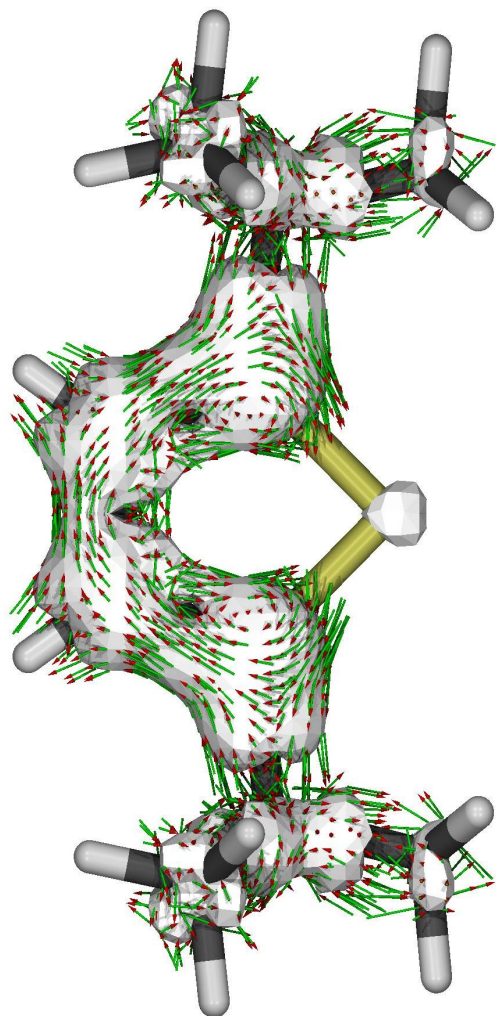

Supplement: c7dt00356k1.pdf [file c7dt00356k1.pdf]
